# Supplementary material
Source: publisher figshare collection journal article supplement (https://gsajournals.figshare.com/articles/dataset/_/7189412)
Supplement: Supplementary file 1 [file 1]

SDR

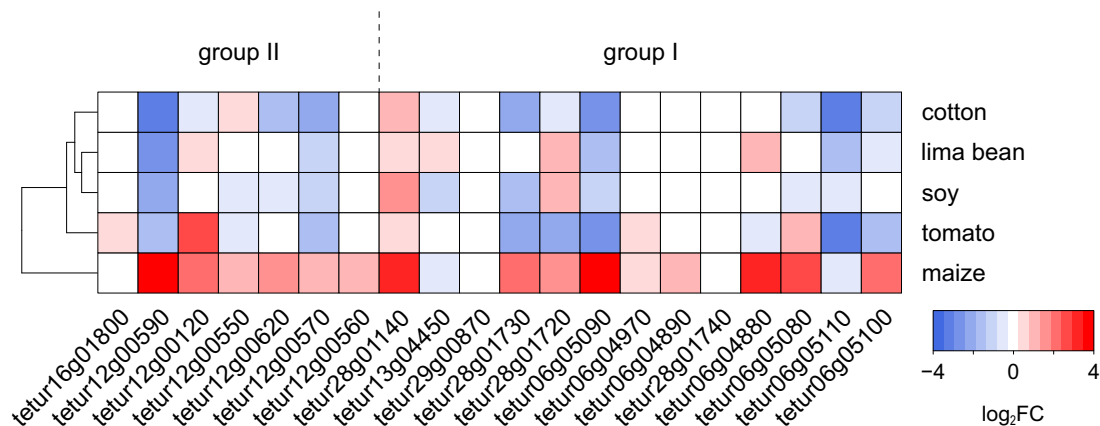

PLAT

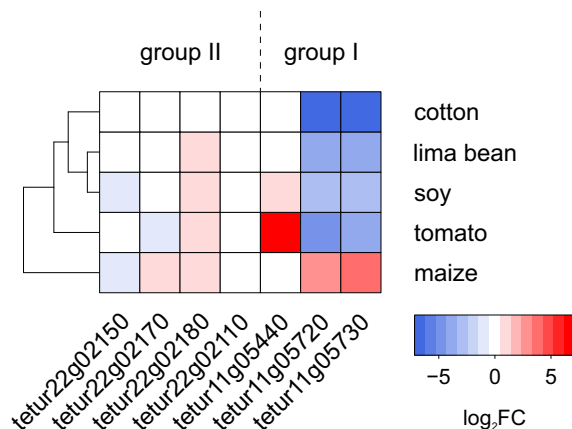

**Figure S1 - Expression heatmaps of genes coding for group I and II SDRs and group I and II single PLAT domain protein genes for the different *T. urticae* host plant populations.** The log<sub>2</sub> transformed gene fold changes of adult *T. urticae* females transferred to new host plants (lima bean, soybean, cotton, tomato, maize) relative to adult *T. urticae* females of the parental population on common bean are shown. Host plants were clustered using a Euclidean distance metric and Ward's method. *T. urticae* genes are shown at the bottom.
